# Supplementary material for: A hybrid gel of hypergravity prepared NiO and polyaniline as Li-ion battery anodes
Source: Royal Society of Chemistry journal article supplement (doi:10.1039/c5ra17929g), 2015-01-01
Supplement: c5ra17929g1.pdf [file c5ra17929g1.pdf]

## Electronic Supplementary Information for

### **Hybrid gel of hypergravity prepared NiO and polyaniline as Li-ion battery anodes**

Ziyang Zhang,<sup>a</sup> Meiying Liang,<sup>a</sup> Xinhua Liu,<sup>a</sup> Fei Zhao,<sup>b</sup> Baofeng Wang,<sup>b</sup>  
Wenjun Li,<sup>\*a</sup> and Qigang Wang,<sup>\*a</sup>

## Figures

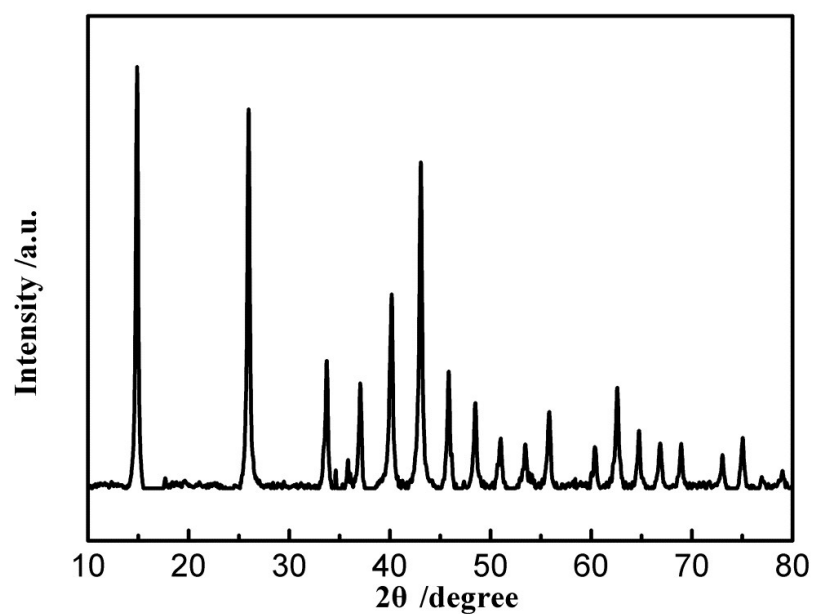

**Figure S1.** XRD patterns of hypergravity  $\text{Ni}(\text{HCO}_3)_2$

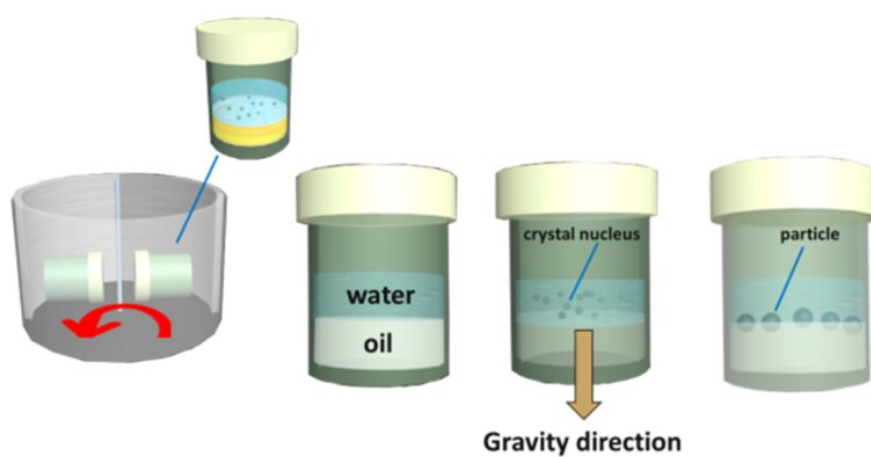

**Figure S2.** Mechanism of the ultracentrifuge apparatus and the growth process of  $\text{Ni}(\text{HCO}_3)_2$  nanoparticles.
